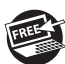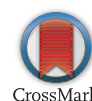

## Issues and Events

### PROFESSIONAL EDUCATION

Take advantage of our variety of continuing education activities and materials for health care professionals. Educational offerings include live and free online programs. Continuing education credits are available. For more information, please visit [professional.diabetes.org/ce](http://professional.diabetes.org/ce).

### SCIENTIFIC SESSIONS

The American Diabetes Association's Scientific Sessions brings together scientists and health care professionals from around the world who are involved in diabetes research and care. Attendees choose from over 3,000 original presentations given by leading experts in the field. For more information, please visit [scientificsessions.diabetes.org](http://scientificsessions.diabetes.org).

#### 76th Scientific Sessions

10–14 June 2016

Ernest N. Morial Convention Center  
New Orleans, LA

#### 77th Scientific Sessions

9–13 June 2017

San Diego Convention Center  
San Diego, CA

**For more information regarding professional education, please e-mail [professionaleducation@diabetes.org](mailto:professionaleducation@diabetes.org) or call 1-800-DIABETES.**

### DIABETES STANDARDS OF CARE 2016 WEBCAST

Presented by Robert E. Ratner, MD, FACP, FACE, Chief Scientific and Medical Officer of the American Diabetes Association, this webcast identifies the Standards of Care recommendations to classify, diagnose, and treat prediabetes and diabetes. To access the webcast, please visit <http://healthmonix.com/ADAWebcastSOC2016/login.aspx>.

### STANDARDS OF CARE MOBILE APP

The American Diabetes Association announces the app update of the *Standards of Medical Care in Diabetes—2016*, a convenient and important resource for all health care professionals who care for people with diabetes. For more information, please visit <http://professional.diabetes.org/content/standards-care-app>.

### MASTERS' APPROACH TO CRITICAL LIMB ISCHEMIA SYMPOSIUM

Plan to attend the Masters' Approach to Critical Limb Ischemia Symposium (MAC Symposium) to be held in Cleveland, OH, on 17–19 April 2016. The multidisciplinary symposium provides a comprehensive review of epidemiology, pathology, diagnosis, and treatment of critical limb ischemia including wound care. Register to learn from expert faculty and participate in engaging case-based discussions on assessment, best technical approaches, tibiopedal access using ultrasound and fluoroscopic guidance, medical therapy, and atherectomy. For more information, please visit [ccfme.org/ccfMAC](http://ccfme.org/ccfMAC). For registration questions, please call (216) 448-8710.
